# Supplementary material
Source: Springer Nature journal article supplement (https://www.springermedizin.de/resource/supplementary/12874_2010_574_MOESM3_ESM.pdf/9432504)

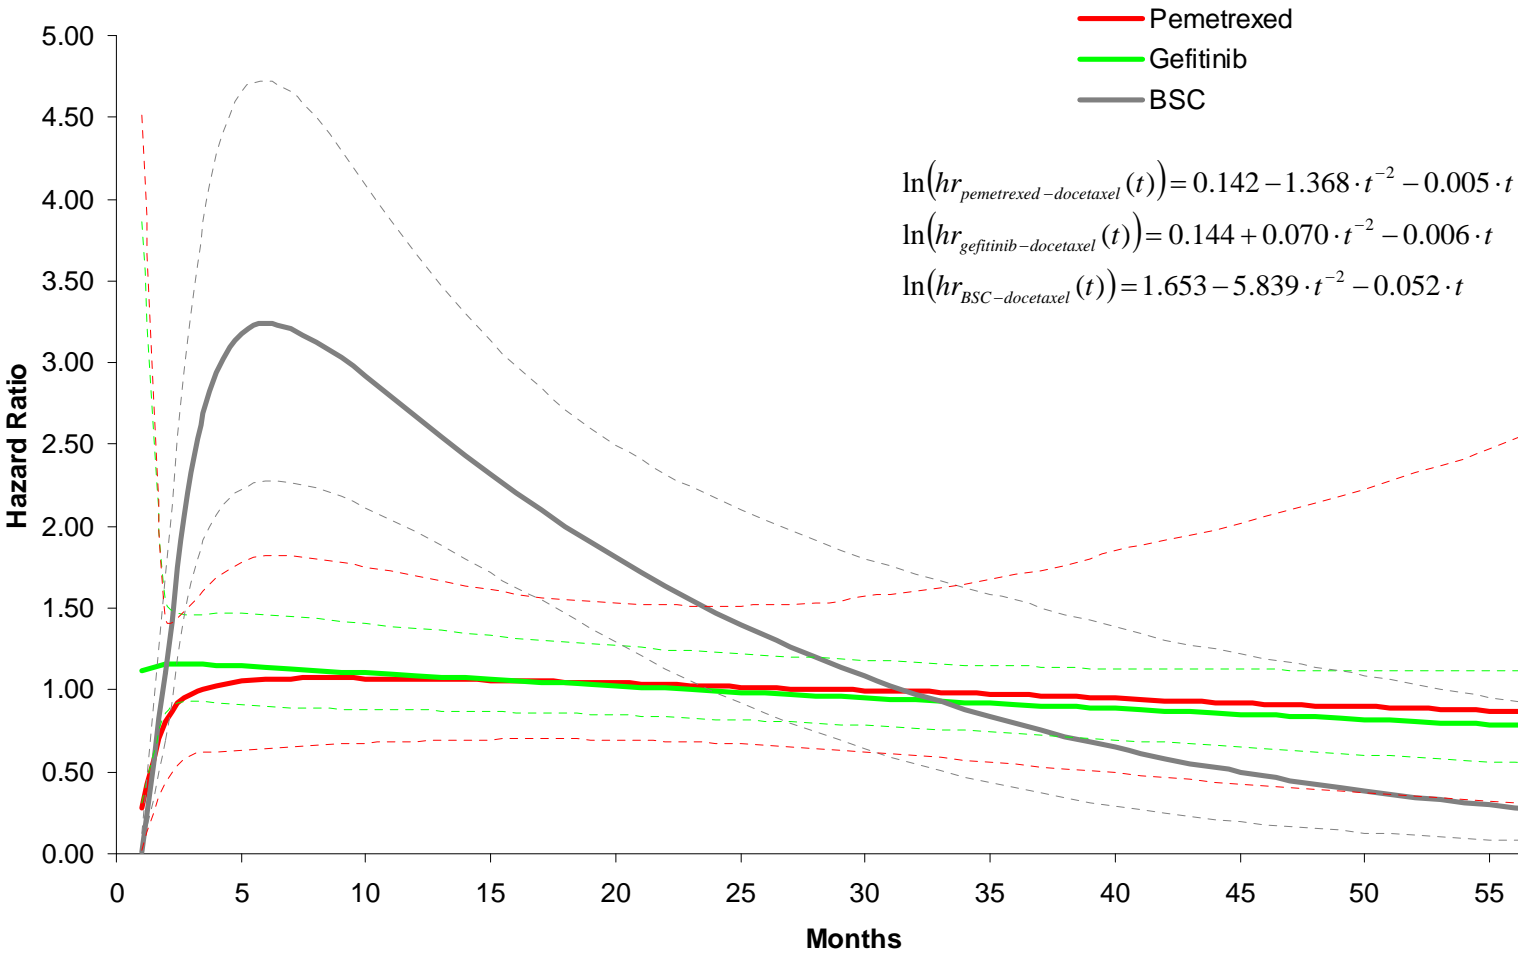

Hazard Ratio

Months

0 5 10 15 20 25 30 35 40 45 50 55

0.00

0.50

1.00

1.50

2.00

2.50

3.00

3.50

4.00

4.50

5.00

Supplement: MOESM3 [file 9432504]
